# Supplementary material for: Identifying acceptable decarbonisation policy packages based on distributive justice preferences
Source: Research Square preprint supplement (doi:10.21203/rs.3.rs-6819963/v1), 2025-09-25
Supplement: Supplementary file 1 [file 0af59cf91a400c994baa583d.pdf]

## Supplementary figures and tables

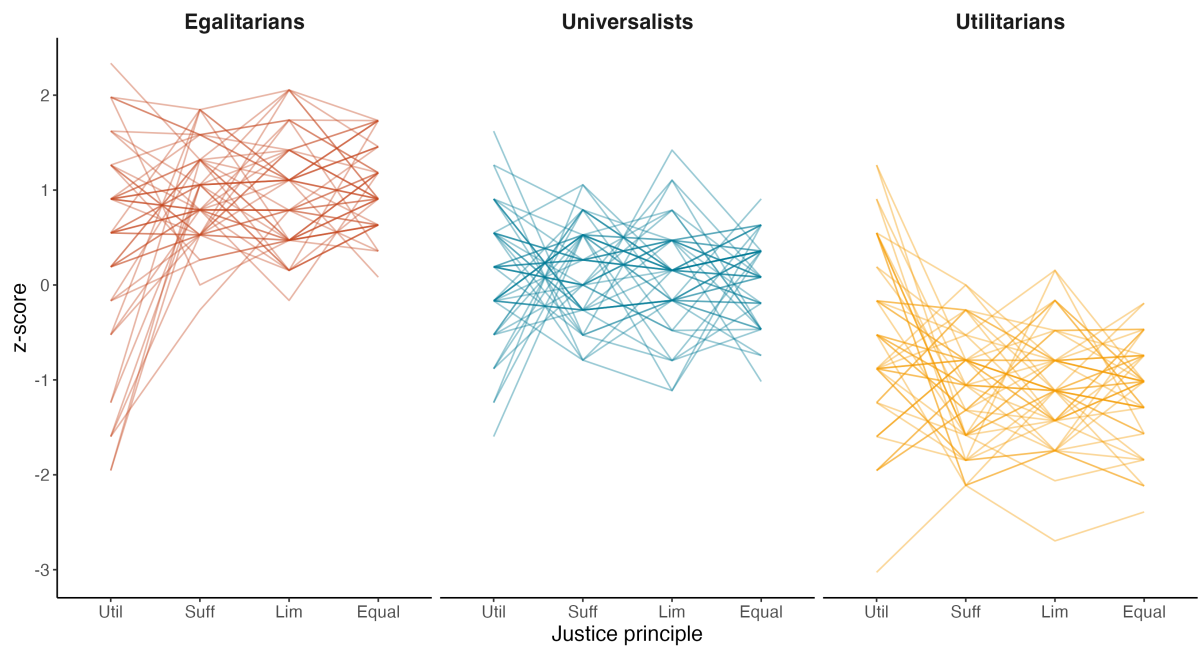

Figure S1: Individual profiles of z-scores across the assessed justice principles. Random subsamples ( $n=50$ ) are displayed for each climate justice orientation to illustrate profiles of individuals. Util = unconstrained outcomes, Suff = sufficiency limit, Lim = Upper limit, Equal = Equal outcomes. Related to Figure 1.

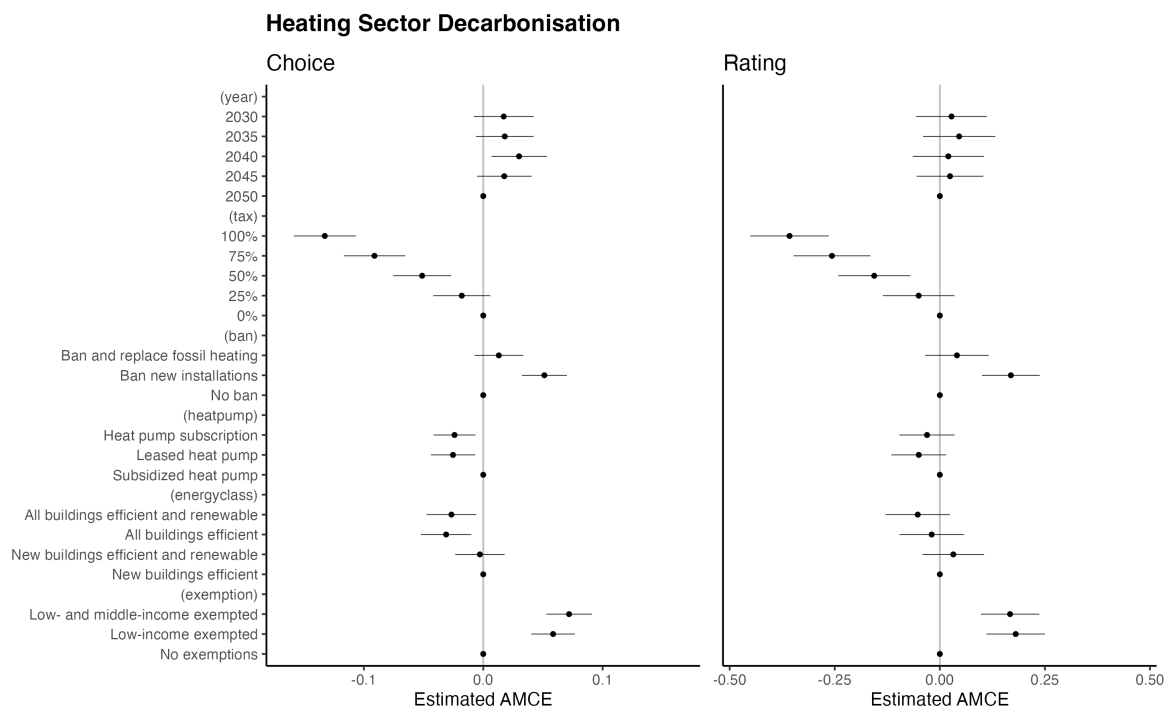

Figure S2: Comparison of choice and rating outcomes for the heating sector decarbonisation experiment, showing average marginal component effects (AMCE).

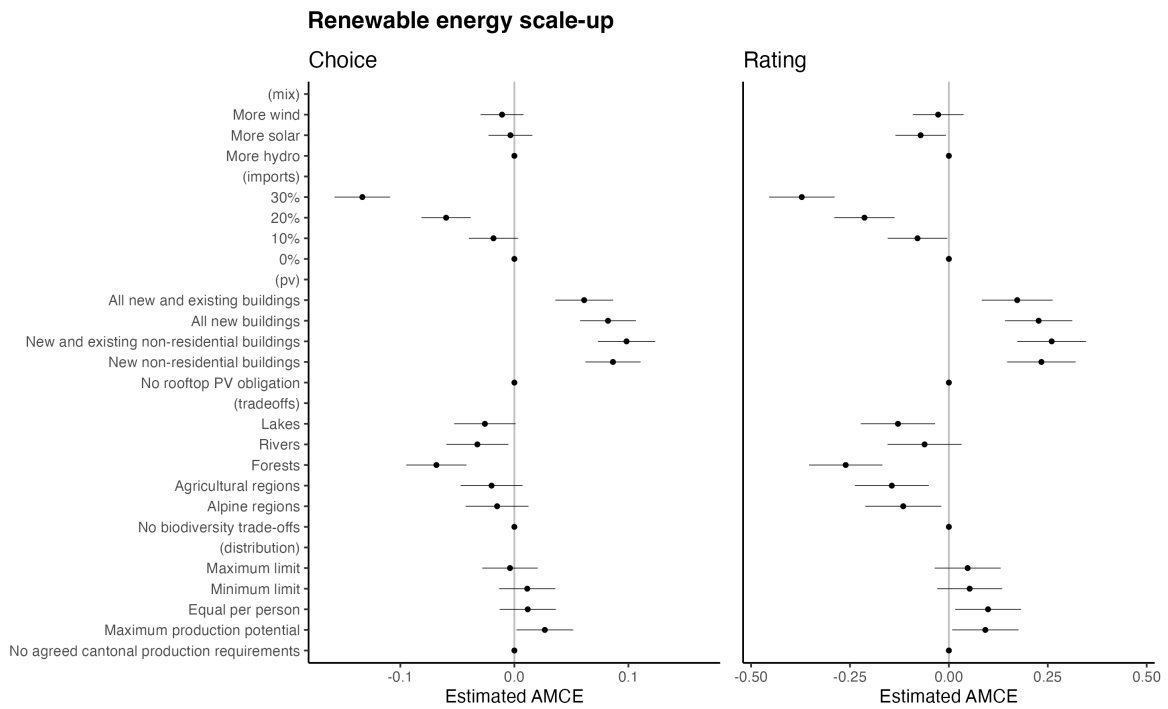

Figure S3: Comparison of choice and rating outcomes for the renewable energy scale-up experiment, showing average marginal component effects (AMCE).

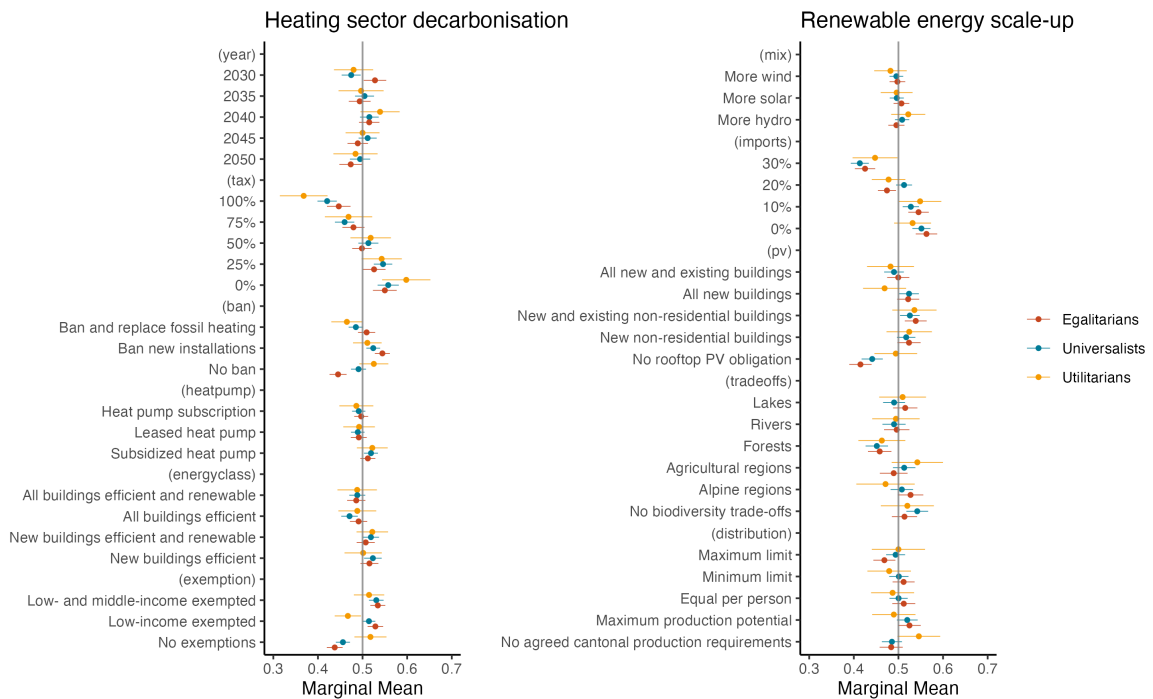

Figure S4: Acceptability for all policy instruments across the three justice orientations, showing marginal means.

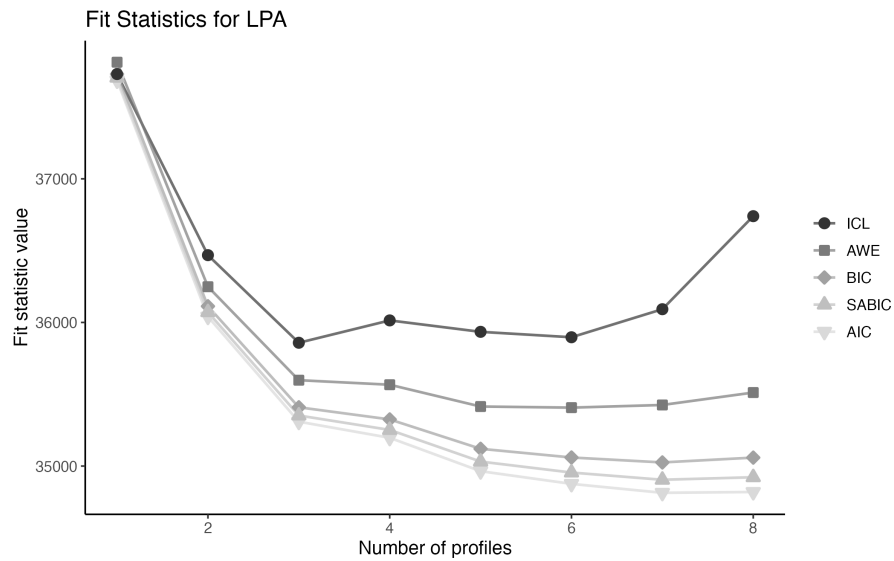

Figure S5: Fit statistics for models with 1 to 8 profiles. These information criteria were used when selecting a solution: AIC – Akaike information criterion, AWE – approximate weight of evidence criterion, BIC – Bayesian information criterion, ICL – integrated completed criterion, SABIC – sample size adjusted BIC. For the ICL, opposite values are plotted to compare these values to the other criteria.

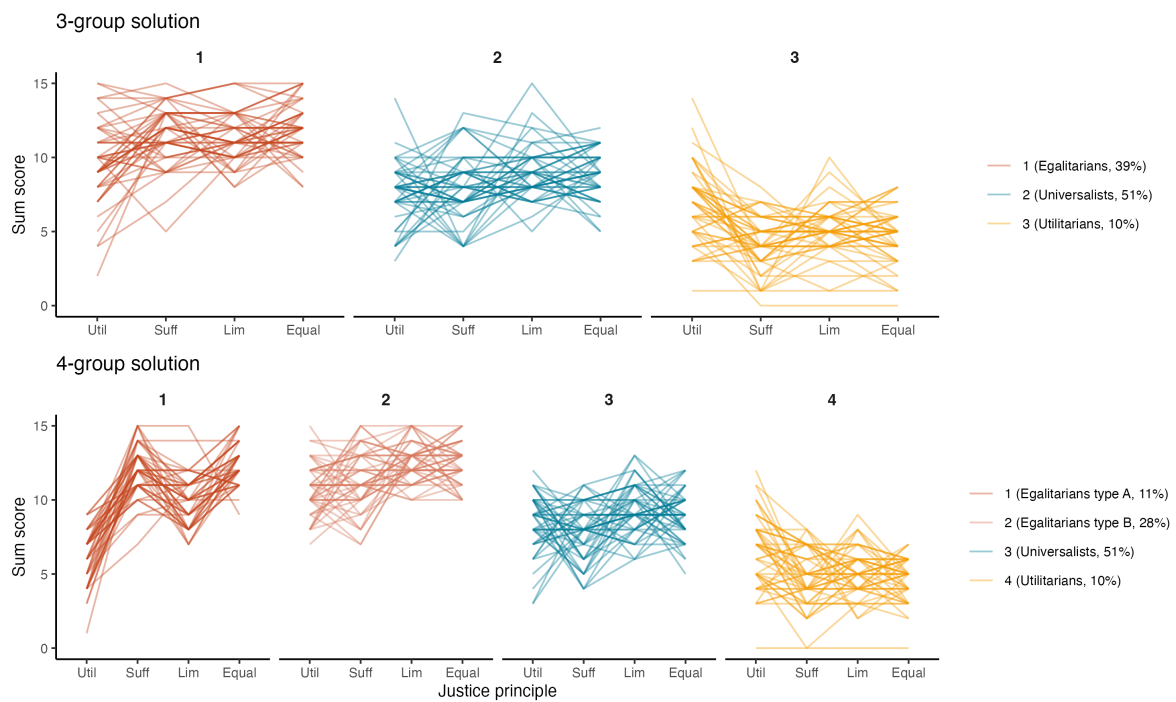

Figure S6: Comparison of the three- and four-group solutions for climate justice orientation. Random subsamples ( $n = 50$ ) are displayed for each group to illustrate profiles of individuals. The egalitarian group in the three-group solution is separated into two smaller groups, with type A showing a clearly lower scores for the utilitarian principle than type B egalitarians. The universalist and utilitarian profiles in the four-group solution are comparable to those in the three-group solution. Util = unconstrained outcomes, Suff = sufficiency limit, Lim = Upper limit, Equal = Equal outcomes. Related to Figures 1 and S1.

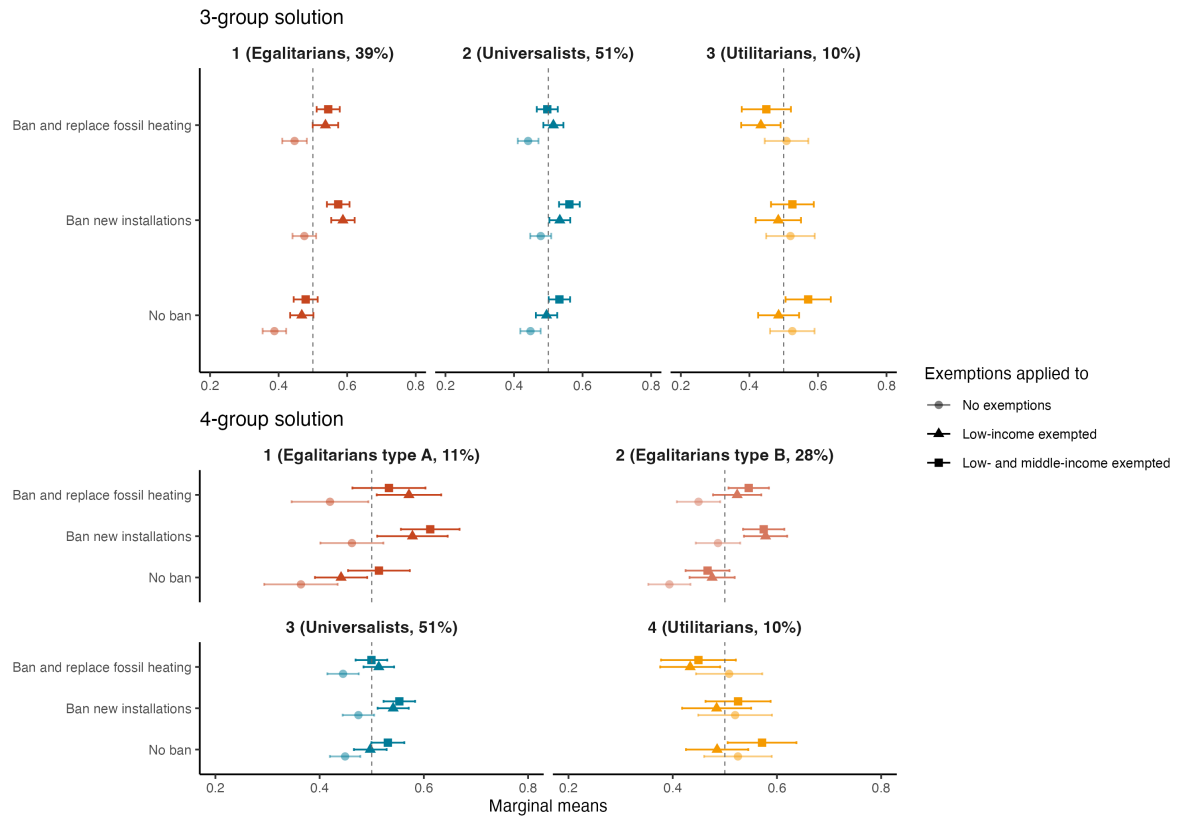

Figure S7: Comparison of the three- and four-group solutions, applying the climate justice orientation on preferences of exemptions to fossil heating bans. The preferences of the universalists and utilitarians are the same in both solutions. The preferences of the two types of egalitarians in the four-group solution are similar to one another and resemble the preferences of the egalitarians in the three-group solution. Related to Figure 3.

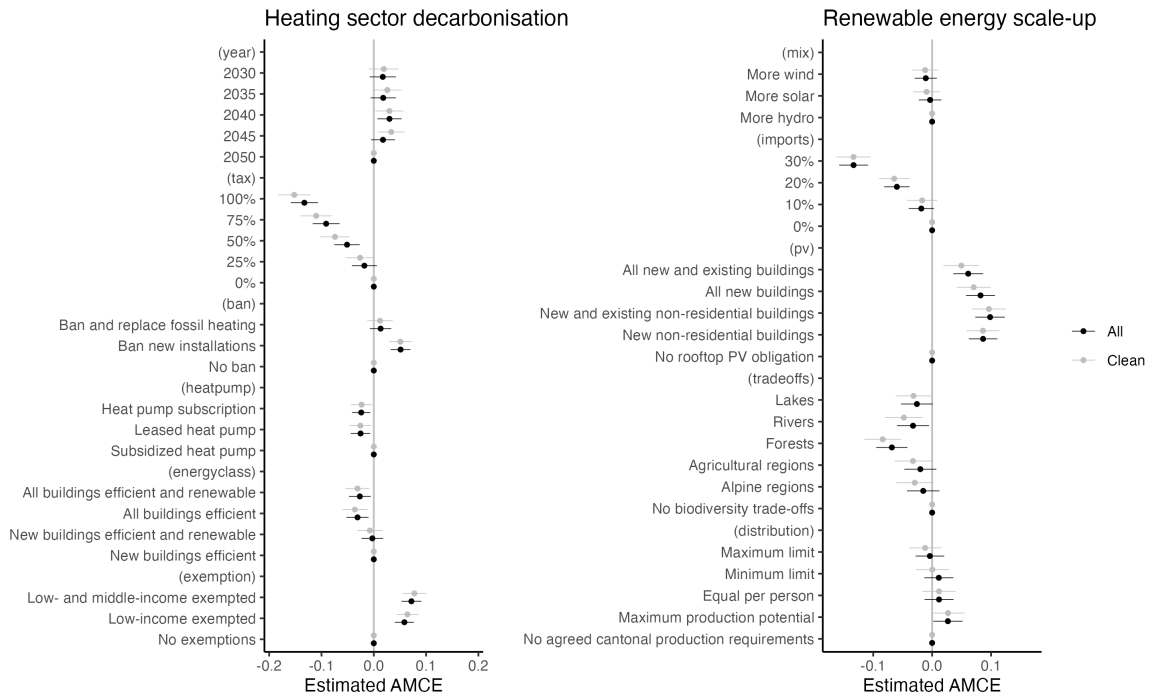

Figure S8: Robustness check for inconsistent data, showing the average marginal component effects (AMCEs) for all attributes in both experiments with all data and clean data. Clean data refers to a subset of the dataset where respondents with observations where the chosen package was rated lower than the non-chosen package were removed.

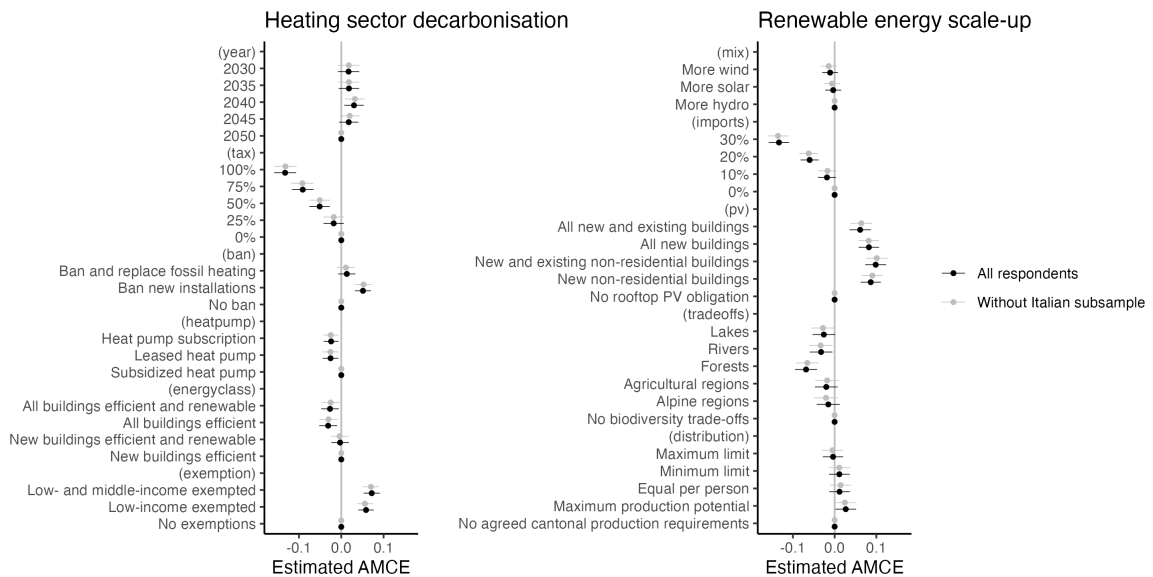

Figure S9: Testing the effects of the sample by comparing the results of all respondents to the results excluding the respondents from the Italian-speaking region. Average marginal component effects (AMCEs) are shown for these samples, with no significant effects between the two samples.

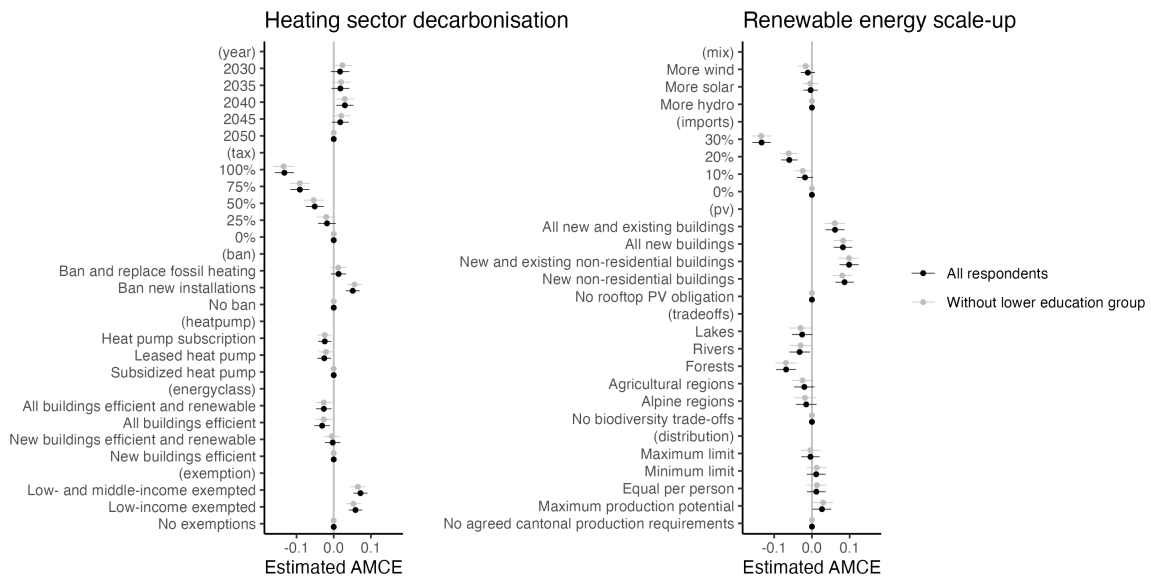

Figure S10: Testing the effects of the sample by comparing the results of all respondents to the results excluding the respondents with lower education levels. Average marginal component effects (AMCEs) are shown for these samples, with no significant effects between the two samples.

|                                                                                 | Statement                                                                                  | Principle          |
|---------------------------------------------------------------------------------|--------------------------------------------------------------------------------------------|--------------------|
| Set 1. General approach to the transition: The energy transition is fair if ... | The total costs are minimised                                                              | Utilitarianism     |
|                                                                                 | Existing inequalities are reduced                                                          | Equal outcomes     |
|                                                                                 | Everybody is guaranteed a minimum standard of living                                       | Sufficientarianism |
|                                                                                 | Nobody receives disproportionately many benefits                                           | Limitarianism      |
|                                                                                 |                                                                                            |                    |
| Set 2. Distributing policy costs: A carbon tax is fair if ...                   | A moderate tax rate is applied to all goods                                                | Utilitarianism     |
|                                                                                 | The lowest tax rate is applied to basic goods and the highest to luxury goods              | Equal outcomes     |
|                                                                                 | A moderate tax rate is applied to all goods except for basic goods                         | Sufficientarianism |
|                                                                                 | A high tax rate is applied to luxury goods, other goods are not taxed                      | Limitarianism      |
| Set 3. Distributing policy benefits: A subsidy is fair if ...                   | A fixed sum is offered to everyone, regardless of their income                             | Utilitarianism     |
|                                                                                 | Buyers with lower incomes receive a higher sum than buyers with higher incomes             | Equal outcomes     |
|                                                                                 | A fixed sum is offered to everyone, and low-income households receive additional financing | Sufficientarianism |
|                                                                                 | A fixed sum is offered to everyone except for households with a high income                | Limitarianism      |

Table S1: Climate justice orientation scale. Each distributional justice principle was assessed through three statements representing different mitigation contexts.

| Type  | Description             | ICC   | p-value | 95% CI       |
|-------|-------------------------|-------|---------|--------------|
| ICC1  | Single raters absolute  | 0.430 | <0.001  | [0.41, 0.45] |
| ICC2  | Single random raters    | 0.435 | <0.001  | [0.40, 0.47] |
| ICC3  | Single fixed raters     | 0.454 | <0.001  | [0.43, 0.48] |
| ICC1k | Average raters absolute | 0.751 | <0.001  | [0.73, 0.77] |
| ICC2k | Average random raters   | 0.755 | <0.001  | [0.73, 0.78] |
| ICC3k | Average fixed raters    | 0.769 | <0.001  | [0.75, 0.79] |

Table S2: Intraclass correlation coefficients (ICC) for within-respondent consistency by justice principle, confirming that as a set, the three items per principle form a coherent scale. ICC1 to ICC3 measure consistency across single responses, treating the raters, in this case the principle, either as fixed or random effects. ICC1k to ICC3k measure consistency across the three responses for each principle, treating principles as either fixed or random effects. High values for ICC1k to ICC3k indicate a composite index across individual items for each principle is justified.

| Attribute                                | Attribute level                                                                     | Stringency | Instrument type |
|------------------------------------------|-------------------------------------------------------------------------------------|------------|-----------------|
| Phase out year of fossil thermal fuels   | 2050                                                                                |            | Regulatory      |
|                                          | 2045                                                                                |            | Regulatory      |
|                                          | 2040                                                                                |            | Regulatory      |
|                                          | 2035                                                                                |            | Regulatory      |
|                                          | 2030                                                                                |            | Regulatory      |
| Tax increase on fossil thermal fuels     | 0%                                                                                  | Low        | Regulatory      |
|                                          | 25%                                                                                 | Medium     | Market-based    |
|                                          | 50%                                                                                 | High       | Market-based    |
|                                          | 75%                                                                                 | High       | Market-based    |
|                                          | 100%                                                                                | High       | Market-based    |
| Ban on fossil boilers                    | No ban on boiler installations                                                      | Low        | Market-based    |
|                                          | Ban on boiler installations                                                         | Medium     | Regulatory      |
|                                          | Ban on boiler installations and mandatory replacement of existing boilers           | High       | Regulatory      |
| Heat pump acquisition through a          | Subsidy                                                                             |            |                 |
|                                          | Governmental loan                                                                   |            |                 |
|                                          | Subscription service                                                                |            |                 |
| Standards for energy efficient buildings | New buildings must be energy efficient                                              |            | Regulatory      |
|                                          | New buildings must be energy efficient and produce renewable electricity on-site    |            | Regulatory      |
|                                          | All buildings need to be energy efficient                                           |            | Regulatory      |
|                                          | All buildings need to be energy efficient and produce on-site renewable electricity |            | Regulatory      |
| Exemptions                               | No exemptions                                                                       |            | Redistributive  |
|                                          | Low-income households are exempted                                                  |            | Redistributive  |
|                                          | Low- and middle-income households are exempted                                      |            | Redistributive  |

Table S3: The attribute table for the experiment on heating sector decarbonisation. All combinations of attribute levels were allowed as per a full random design. Stringency and instrument type relate to Figures 2 and 4.

| Attribute                          | Attribute level                                                                                                                                                                                               | Stringency                              | Instrument type                                                                      | Electricity Act |
|------------------------------------|---------------------------------------------------------------------------------------------------------------------------------------------------------------------------------------------------------------|-----------------------------------------|--------------------------------------------------------------------------------------|-----------------|
| Target electricity mix             | 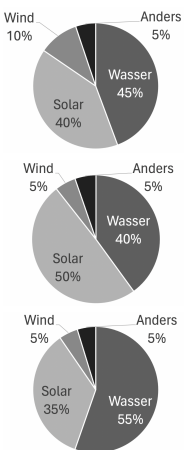                                                                                                                             |                                         |                                                                                      | Yes             |
| Net imports                        | 0%<br>10%<br>20%<br>30%                                                                                                                                                                                       |                                         |                                                                                      | Yes             |
| Obligatory rooftop solar           | No obligation<br>New public and commercial buildings<br>New and existing public and commercial buildings<br>All new buildings<br>All new and existing buildings                                               | Low<br>Medium<br>High<br>Medium<br>High | Market-based<br>Regulatory<br>Regulatory<br>Regulatory<br>Regulatory                 | Yes             |
| Permit renewable electricity in/on | No exceptions<br>Alpine areas<br>Agriculture areas<br>Forests<br>Rivers<br>Lakes                                                                                                                              |                                         | Regulatory<br>Market-based<br>Market-based<br>Market-based<br>Market-based           | Yes<br>Yes      |
| Cantonal distribution              | No agreed distribution<br>Based on how much a canton can produce<br>Based on how many people live in each canton<br>Based on an agreed minimum production level<br>No canton produces disproportionately much |                                         | Market-based<br>Redistributive<br>Redistributive<br>Redistributive<br>Redistributive |                 |

Table S4: The attribute table for the experiment on scaling up renewable energy production. All combinations of attribute levels were allowed as per a full random design. Stringency and instrument type relate to Figures 2 and 4. The attributes levels with Yes for Electricity Act were used to identify packages most similar to the Electricity Act as part of external validation of results.



| No. profiles | BIC    | AIC    | Entropy | Minimum probability | Maximum probability | Smallest group |
|--------------|--------|--------|---------|---------------------|---------------------|----------------|
| 1            | 37,730 | 37,680 | 1.00    | 1.00                | 1.00                | 100%           |
| 2            | 36,112 | 36,040 | 0.742   | 0.889               | 0.943               | 36.4%          |
| 3            | 35,410 | 35,310 | 0.790   | 0.882               | 0.908               | 9.8%           |
| 4            | 35,320 | 35,200 | 0.736   | 0.562               | 0.926               | 9.8%           |
| 5            | 35,120 | 34,960 | 0.737   | 0.636               | 0.906               | 5.8%           |
| 6            | 35,060 | 34,880 | 0.756   | 0.577               | 0.915               | 2.2%           |
| 7            | 35,030 | 34,810 | 0.718   | 0.605               | 0.907               | 2.3%           |
| 8            | 35,060 | 34,820 | 0.631   | 0.362               | 0.899               | 2.2%           |

Table S5: Fit indices and model characteristics for latent profile analysis for models with one to eight profiles. BIC – Bayesian information criterion, AIC – Akaike information criterion.

| Outcome variable | Definition | Packages        | n      | MM                 | p      | Support % |
|------------------|------------|-----------------|--------|--------------------|--------|-----------|
| Rating           | Target mix | Electricity Act | 509    | 0.32 [0.17; 0.46]  | <0.001 | 62%       |
|                  |            | Other           | 15,174 | 0.20[0.13; 0.26]   | <0.001 |           |
|                  | Tradeoffs  | Electricity Act | 119    | 0.24 [-0.04; 0.51] | 0.099  | 59%       |
|                  |            | Other           | 15,561 | 0.20 [0.14; 0.26]  | <0.001 |           |
| Choice           | Target mix | Electricity Act | 509    | 0.54 [0.49; 0.58]  | <0.001 |           |
|                  |            | Other           | 15,174 | 0.50 [0.50; 0.50]  | <0.001 |           |
|                  | Tradeoffs  | Electricity Act | 119    | 0.52 [0.43; 0.60]  | <0.001 |           |
|                  |            | Other           | 15,561 | 0.50 [0.50; 0.50]  | <0.001 |           |

Table S6: External validation of the conjoint analysis results. Marginal means (MM) with 95% confidence intervals for the combinations of packages resembling the Swiss renewable electricity act for both rating and choice outcomes. For rating data, 0 represents neutral sentiments with positive numbers representing support. Support percentage reflects the percentage of packages rated with Somewhat support, Support, or Completely support for the rating outcome, or the percentage of packages that were chosen for the choice outcome. All three outcomes, marginal means for rating data, marginal means for choice data, and the support percentages, show that the packages resembling the Electricity Act were overall supported.
