# Supplementary material for: Identifying acceptable decarbonisation policy packages based on distributive justice preferences
Source: Research Square preprint supplement (doi:10.21203/rs.3.rs-6819963/v1), 2025-09-25
Supplement: Supplementary file 2 [file 315f63a6c4992d7e885a8040.pdf]

# Survey instrument

## Language

- Deutsch
- Français
- Italiano

## Herzlich Willkommen!

Wir laden Schweizer Bürgerinnen und Bürger, die mindestens 18 Jahre alt sind, ein, an unserer Umfrage zu den Präferenzen für klimafreundliche Energie- und Wärmeversorgung des Forschungsprojekts Speed2Zero teilzunehmen.

Wir stellen Ihnen einige Fragen zu Ihrer Person, zur Energiewende und zu Ihren Präferenzen. Die Umfrage sollte 10–15 Minuten dauern. Die Ergebnisse der Studie sollen Forschern und politischen Entscheidungsträgern Aufschluss über das Stimmungsbild der Bevölkerung geben.

Wir erheben Ihre Daten ausschliesslich in anonymer Form. Persönliche Daten, wie Ihren Namen, Wohnort, oder Kontaktdaten erheben wir nicht. Die anonymen Daten werden wir im Rahmen der Forschungstätigkeit veröffentlichen. Ihre Teilnahme ist freiwillig und Sie können Ihre Teilnahme jederzeit ohne Angabe von Gründen und ohne Nachteile zurückziehen.

Diese Studie wurde von der Ethikkommission der ETH Zürich als Antrag EK-2024-N-137 geprüft. Wenn Sie Fragen zur Umfrage haben, wenden Sie sich bitte an Kristiina Joon (Climate Policy Lab, ETH Zürich) unter [kristiina.joon@usys.ethz.ch](mailto:kristiina.joon@usys.ethz.ch). Für Beschwerden zur Umfrage steht Ihnen das Sekretariat der Ethikkommission der ETH Zürich unter [ethics@sl.ethz.ch](mailto:ethics@sl.ethz.ch) oder 0041 44 632 85 72 zur Verfügung.

Vielen Dank für Ihre Teilnahme an unserer Studie.

## Einverständniserklärung

Ich bestätige, dass

- ☐ ich die Informationen zur Studie gelesen und verstanden habe.
- ☐ ich genug Zeit hatte, mich für oder gegen die Teilnahme zu entscheiden.
- ☐ ich freiwillig an dieser Studie teilnehme und ich einverstanden bin mit der Nutzung meiner Daten, wie oben beschrieben.
- ☐ ich verstanden habe, dass ich meine Teilnahme jederzeit und folgenlos beenden kann.

## Über Sie

Mit welchem Geschlecht identifizieren Sie sich?

- Weiblich
- Männlich
- Nicht-binär

Wie alt sind Sie?

- 18-39 Jahre
- 40-64 Jahre
- 65-79 Jahre
- 80 Jahre oder älter

In welcher Schweizer Sprachregion wohnen Sie?

- Deutschsprachige Schweiz
- Französischsprachige Schweiz
- Italienischsprachige Schweiz
- Rätoromanische Schweiz



In welchem Kanton leben Sie?

Zürich, Bern, Luzern, Uri, Schwyz, Obwalden, Nidwalden, Glarus, Zug, Freiburg, Solothurn, Basel Stadt, Basel Land, Schaffhausen, Appenzell Ausserrhoden, Appenzell Innerrhoden, Sankt Gallen, Graubünden, Aargau, Thurgau, Ticino, Vaud, Wallis, Neuchâtel, Genève, Jura

Haben Sie die Schweizer Staatsbürgerschaft?

- Ja
- Nein

Was ist der höchste Bildungsabschluss, den Sie erzielt haben?

- Keine Matura
- Matura oder Berufsausbildung
- Abschluss einer Fachhochschule oder Universität

Wo leben Sie?

- Stadt
- Agglomeration
- Land

Sind Sie Besitzer:in oder Mieter:in der Wohnung oder des Hauses, in dem Sie leben?

- Mieter:in
- Besitzer:in

Welche der folgenden Kategorien beschreibt Ihr Haushaltsbruttoeinkommen im Jahr 2023 am besten? Dies ist das Gesamteinkommen vor Steuern von Personen, die zusammenleben und sich Einkommen und Ausgaben teilen.

- Unter CHF 70,000
- CHF 70,000 - CHF 100,000
- CHF 100,001 - CHF 150,000
- CHF 150,001 - CHF 250,000
- Über CHF 250,000

Wie viele Personen leben in Ihrem Haushalt, die zusammenleben und sich Einkommen und Ausgaben teilen, einschliesslich Sie selbst?

## Vertrauen in Entscheidungsträger:innen

In diesem Abschnitt werden wir Ihr politisches Vertrauen und Ihre Zufriedenheit mit der Regierung untersuchen.

Auf einer Skala von 0 bis 10, auf der 0 "Kein Vertrauen" und 10 "Volles Vertrauen" entspricht, wie würden Sie Ihr Vertrauen in Politiker:innen, den Nationalrat und politische Parteien einschätzen?

*Bewegen Sie den Schieberegler auf die am besten passende Punktzahl.*

|                                                    | 0 | 1 | 2 | 3 | 4 | 5 | 6 | 7 | 8 | 9 | 10 |
|----------------------------------------------------|---|---|---|---|---|---|---|---|---|---|----|
| Vertrauen in Politiker:innen                       |   |   |   |   |   |   |   |   |   |   |    |
| Vertrauen in die Bundesversammlung (das Parlament) |   |   |   |   |   |   |   |   |   |   |    |
| Vertrauen in politische Parteien                   |   |   |   |   |   |   |   |   |   |   |    |

Auf einer Skala von 0 bis 10, auf der 0 "Extrem unzufrieden" und 10 "Extrem zufrieden" entspricht, wie würden Sie Ihre Zufriedenheit mit der aktuellen nationalen Regierung?



*Bewegen Sie den Schieberegler auf die am besten passende Punktzahl.*

|                             |   |   |   |   |   |   |   |   |   |   |    |
|-----------------------------|---|---|---|---|---|---|---|---|---|---|----|
|                             | 0 | 1 | 2 | 3 | 4 | 5 | 6 | 7 | 8 | 9 | 10 |
| Zufriedenheit mit Regierung |   |   |   |   |   |   |   |   |   |   |    |

Mit welcher der folgenden Parteien identifizieren Sie sich am Stärksten?

Schweizerische Volkspartei (SVP), Sozialdemokratische Partei der Schweiz (SP), Die Mitte (ehemals CVP/BDP), Die Liberalen (FDP), Grüne Partei der Schweiz (GPS), Grünliberale Partei (GLP), Andere, Keine, Möchte ich nicht sagen

## Gerechte Energiewende

Menschen können je nach Kontext unterschiedliche Aspekte als gerecht empfinden. In diesem Abschnitt möchten wir herausfinden, was Sie im Zusammenhang mit der Energiewende als gerecht empfinden.

Die Energiewende bezieht sich auf die Veränderungen, die erforderlich sind, um unser Energiesystem von fossilen Energien, wie Öl und Erdgas, auf erneuerbare Energien, wie Wind und Solarkraft, umzustellen.

Unter der Annahme, dass alle Optionen zu den gleichen Emissionsminderungen führen, ist die Energiewende dann gerecht, wenn...

|                                                                                          | Stimme überhaupt nicht zu | Stimme voll und ganz zu |
|------------------------------------------------------------------------------------------|---------------------------|-------------------------|
| die Gesamtkosten, ungeachtet der Ungleichheiten zwischen den Menschen, minimiert werden. | <input type="radio"/>     | <input type="radio"/>   |
| bestehende Ungleichheiten verringert werden.                                             | <input type="radio"/>     | <input type="radio"/>   |
| allen Menschen ein Mindeststandard an Wohlstand zugesichert wird.                        | <input type="radio"/>     | <input type="radio"/>   |
| Höchstgrenzen so gesetzt werden, dass niemand übermässig viel bekommt.                   | <input type="radio"/>     | <input type="radio"/>   |

Eine CO<sub>2</sub>-Steuer besteuert Treibhausgasemissionen. Sie wird derzeit auf fossile Brennstoffe und Industrie angewendet, könnte aber auch auf die Emissionen aller anderen Güter angewendet werden, z. B. Lebensmittel und Technologieprodukte.

Unter der Annahme, dass alle Optionen zu den gleichen Emissionsminderungen führen, ist eine CO<sub>2</sub>-Steuer dann gerecht, wenn ...

|                                                                                           | Stimme überhaupt nicht zu | Stimme voll und ganz zu |
|-------------------------------------------------------------------------------------------|---------------------------|-------------------------|
| ein moderater Steuersatz auf alle Güter angewendet wird.                                  | <input type="radio"/>     | <input type="radio"/>   |
| der niedrigste Steuersatz auf Grundgüter und der höchste auf Luxusgüter angewendet wird.  | <input type="radio"/>     | <input type="radio"/>   |
| ein moderater Steuersatz auf alle Güter mit Ausnahme der Grundgüter erhoben wird.         | <input type="radio"/>     | <input type="radio"/>   |
| ein hoher Steuersatz auf Luxusgüter angewendet wird, andere Güter werden nicht besteuert. | <input type="radio"/>     | <input type="radio"/>   |

Eine **Subvention** ist eine einmalige Zahlung der Regierung für den Kauf eines Produkts, z. B. einer Wärmepumpe. Sie unterstützt den Kund:innen, indem sie den Preis für den Kauf senkt.

Unter der Annahme, dass alle Optionen zu den gleichen Emissionsminderungen führen, ist eine Subvention dann gerecht, wenn ...



|                                                                                                                                          | Stimme überhaupt nicht zu | Stimme voll und ganz zu |
|------------------------------------------------------------------------------------------------------------------------------------------|---------------------------|-------------------------|
| sie allen im gleichen Mass zur Verfügung steht.                                                                                          |                           | ○ ○ ○ ○ ○ ○             |
| Käufer:innen mit geringerem Einkommen einen höheren Betrag erhalten als Käufer:innen mit höherem Einkommen.                              |                           | ○ ○ ○ ○ ○ ○             |
| sie allen angeboten wird und Haushalte mit niedrigem Einkommen eine zusätzliche Finanzierung für den verbleibenden Teil erhalten können. |                           | ○ ○ ○ ○ ○ ○             |
| sie allen angeboten wird, ausser Haushalten mit hohem Einkommen.                                                                         |                           | ○ ○ ○ ○ ○ ○             |

## Der Schweizer Energiesektor

In diesem Abschnitt werden wir Ihr Verständnis von energiebezogenen Konzepten abfragen, wie beispielsweise der Energieeffizienz, der erneuerbaren Energiequellen und dem sektoralen Energieverbrauch.

Wie heizen Sie hauptsächlich Ihr Zuhause?

Biomasse, Fernwärme, Elektrisch, Öl, Flüssiggas, Wärmepumpe, Wasserstoff, Gas, Solar, Anders, Weiss ich nicht

In der Schweiz erfolgt die Stromproduktion hauptsächlich mit:

- Wasserkraft
- Kernkraft
- Konventionelle Wärmekraftwerke (z.B. Kohle-, Öl- oder Gaskraftwerke)

Was schätzen Sie, welcher Prozentsatz der Wohngebäude in der Schweiz wird mit fossilen Brennstoffen beheizt?

- 20%
- 40%
- 60%
- 80%

Welche der folgenden Ressourcen ist erneuerbar?

- Kohle
- Öl
- Wasserkraft
- Erdgas

Welche ist die energieeffizienteste Technologie zum Heizen?

- Wärmepumpe
- Gasheizung
- Pelletheizung
- Elektroheizung

Unter dem Gebäudesektor werden die Emissionen aus den Haushalten (Wohngebäude) und den Dienstleistungen (Geschäftsgebäude) zusammengefasst. Wie hoch schätzen Sie den Anteil der CO<sub>2</sub>-Emissionen aus dem Gebäudesektor in der Schweiz? Bitte wählen Sie auf einer Skala von 0% bis 100%.



## Schweizer Wärmewende

Der Wärmesektor in der Schweiz ist stark von fossilen Brennstoffen abhängig. Um die Schweizer Klimaziele zu erreichen, ist es entscheidend, die Emissionen aus dem Wärmesektor zu eliminieren, da dieser für rund **ein Drittel der inländischen CO<sub>2</sub>-Emissionen** verantwortlich ist <sup>1</sup>.

Wir zeigen Ihnen nun **acht Aufgaben**, in der Sie jeweils zwei politische Massnahmenpakete bewerten. Zuerst erhalten Sie Informationen zu den verschiedenen politischen Instrumenten, aus denen die Massnahmenpakete zur Förderung der Wärmewende in der Schweiz bestehen. Bitte wählen Sie das Paket aus, das Sie bevorzugen und bewerten Sie beide Pakete <sup>2</sup>.

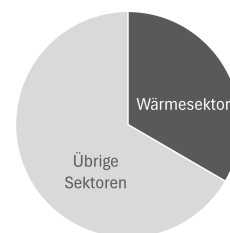

### Informationen zu den Massnahmenpaketen

- **Ausstiegsjahr aus fossiler Wärme:** Zeitplan für die Verringerung und schliesslich den Ausstieg aus der Verwendung fossiler Brennstoffe im Wärmesektor.
- **Erhöhung der aktuellen CO<sub>2</sub>-Abgabe auf fossile Brennstoffe:** Prozentuale Erhöhung der aktuellen Steuer auf fossile Brennstoffe von 120 CHF pro Tonne CO<sub>2</sub>.
- **Verbot von fossilen Heizungen:** Vorschriften für die Installation und den Austausch herkömmlicher Heizungsanlagen auf fossiler Brennstoffbasis.
- **Anschaffungsoptionen für Wärmepumpen:** Staatliche Unterstützung für den Einsatz von Wärmepumpen durch Einmalzahlungen, staatliche Leasing-Optionen oder den Zugang zu Wärme über einen Abonnementdienst, bei dem die Wärmepumpe gemietet wird, jedoch mit umfassendem Service für Installation, Betrieb und Wartung.
- **Energienormen für Gebäude:** Anforderungen an Gebäude zur Minimierung des Energieverbrauchs und der Umweltauswirkungen.
- **Ausnahmen:** Es ist möglich, einige Haushalte von Massnahmen wie Steuern, Verboten und Gebäudenormen auszunehmen. Auf diese Weise bleibt die Massnahme in Kraft, aber vulnerable Gruppen sind weniger betroffen.

### Aufgabe 1/8

|                                                                           | Massnahmenpaket 1                                                                 | Massnahmenpaket 2                         |
|---------------------------------------------------------------------------|-----------------------------------------------------------------------------------|-------------------------------------------|
| Erhöhung der aktuellen CO <sub>2</sub> -Abgabe auf fossile Brennstoffe um | 0%                                                                                | 100%                                      |
| Ausnahmen                                                                 | Geringverdienende Haushalte sind ausgenommen                                      | Keine Ausnahmen                           |
| Verbot von fossilen Heizungen                                             | Verbot                                                                            | Verbot                                    |
| Anschaffungsoptionen für Wärmepumpen                                      | Wärmepumpe mit Subventionen kaufen                                                | Wärmepumpe mit Subventionen kaufen        |
| Energienormen für Gebäude                                                 | Neue Gebäude müssen energieeffizient sein und vor Ort erneuerbaren Strom erzeugen | Alle Gebäude müssen energieeffizient sein |
| Ausstiegsjahr aus fossiler Wärme                                          | 2030                                                                              | 2045                                      |

<sup>1</sup>Participants will be randomly selected to either see the pie chart along with the text stating that the heating sector contributes to approximately one-third of domestic CO<sub>2</sub> emissions, or to see the text alone without this emission information.

<sup>2</sup>Participants will be randomly selected to either take part in the heating sector or the renewable energy conjoint experiment.



Welches Massnahmenpaket bevorzugen Sie?<sup>3</sup>

- Massnahmenpaket 1
- Massnahmenpaket 2

Würden Sie diese Massnahmenpakete unterstützen?

|                   | Stark dagegen                                                                                                 | Stark dafür |
|-------------------|---------------------------------------------------------------------------------------------------------------|-------------|
| Massnahmenpaket 1 | <input type="radio"/> <input type="radio"/> <input type="radio"/> <input type="radio"/> <input type="radio"/> |             |
| Massnahmenpaket 2 | <input type="radio"/> <input type="radio"/> <input type="radio"/> <input type="radio"/> <input type="radio"/> |             |

## Ausbau der erneuerbaren Energien

Um die Schweizer Klimaziele zu erreichen, ist es entscheidend, die Stromproduktion aus erneuerbaren Energien zu erhöhen. Dies kann auf verschiedene Weise geschehen.

Wir zeigen Ihnen nun **acht Aufgaben**, in der Sie jeweils zwei politische Massnahmenpakete bewerten. Zuerst erhalten Sie Informationen zu den verschiedenen politischen Instrumenten, aus denen die Massnahmenpakete zur Unterstützung des Übergangs der Schweiz zu erneuerbaren Energien bestehen. Bitte wählen Sie das Paket aus, das Sie bevorzugen und bewerten Sie beide Pakete.

### Informationen zu den Massnahmenpaketen

- **Ziele für den Strommix:** Der Strom muss zu 100% aus erneuerbaren Energien erzeugt werden, aber dafür gibt es verschiedene Technologien.
- **Stromimporte:** Zur Deckung ihres gesamten Elektrizitätsbedarfs ist die Schweiz auf Stromimporte angewiesen. Der Nettoimportanteil an der gesamten Elektrizitätsversorgung betrug in 2022 rund 6%.
- **Verpflichtende Installation von Dachflächensolaranlagen:** Derzeit können sich die Bürger:innen für die Installation von Solarzellen auf dem Dach entscheiden, doch könnte dies auf verschiedene Weise zur Pflicht gemacht werden.
- **Genehmigung von Erzeugungsanlagen:** In einigen Fällen müssen möglicherweise bestimmte Landschaften oder Lebensräume für die Installation von Infrastrukturen für erneuerbare Energien genutzt werden.
- **Stromerzeugung pro Kanton:** Es gibt viele Möglichkeiten, die neue Infrastruktur für erneuerbare Energien zu verbreiten, wobei einige Kantone mehr und andere weniger Strom produzieren.

<sup>3</sup>This task and the following will be repeated seven times, with participants evaluating two randomly generated policy packages each time. The eighth choice task will be identical to the first, with the policy packages having swapped sides to be able to correct for inter-respondent inconsistencies.



|                                                          | Massnahmenpaket 1                                                                 | Massnahmenpaket 2                                                                   |
|----------------------------------------------------------|-----------------------------------------------------------------------------------|-------------------------------------------------------------------------------------|
| Stromimporte                                             | 10%                                                                               | 30%                                                                                 |
|                                                          | 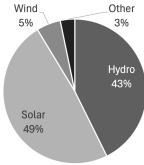 |  |
| Ziele für den Strommix                                   |                                                                                   |                                                                                     |
| Stromerzeugung pro Kanton                                | basierend auf dem Erzeugungspotenzial                                             | basierend auf der Bevölkerungszahl                                                  |
| Dachflächensolaranlagen auf                              | allen neuen Gebäuden                                                              | keine Verpflichtungen                                                               |
| In Ausnahmefällen sind Erzeugungsanlagen erlaubt in/ auf | Seen                                                                              | Alpenregionen                                                                       |

Welches Massnahmenpaket bevorzugen Sie?

- Massnahmenpaket 1
- Massnahmenpaket 2

Würden Sie diese Massnahmenpakete unterstützen?

|                   | Stark dagegen                                                                                                 | Stark dafür |
|-------------------|---------------------------------------------------------------------------------------------------------------|-------------|
| Massnahmenpaket 1 | <input type="radio"/> <input type="radio"/> <input type="radio"/> <input type="radio"/> <input type="radio"/> |             |
| Massnahmenpaket 2 | <input type="radio"/> <input type="radio"/> <input type="radio"/> <input type="radio"/> <input type="radio"/> |             |

Gibt es noch etwas, was sie uns mitteilen wollen?

Wir danken Ihnen für Ihre Teilnahme an dieser Umfrage.

Ihre Antwort wurde erfasst.
